# Supplementary material for: Foaming of 3D-Printed PLA/CaCO3 Composites by Supercritical CO2 Process for Sustainable Food Contact Materials
Source: MDPI journal article supplement (doi:10.3390/polym16060798), 2024-03-13
Supplement: s1 [file s1]

Supporting Information

# Foaming of 3D printed PLA/CaCO<sub>3</sub> composites by Supercritical CO<sub>2</sub> process for sustainable food contact materials

Simón Faba <sup>1,2\*</sup>, Ángel Agüero <sup>2,3</sup>, Marina P. Arrieta <sup>2,4,\*</sup>, Sara Martínez <sup>1</sup>, Julio Romero <sup>5</sup>, Alejandra Torres <sup>1</sup> and María José Galotto <sup>1</sup>

<sup>1</sup> Packaging Innovation Center (LABEN-CHILE), Department of Food Science and Technology, Faculty of Technology, Center for the Development of Nanoscience and Nanotechnology (CEDENNA), University of Santiago de Chile (USACH) 9170201 Santiago, Chile.; simon.faba@usach.cl (S.F.); maria.galotto@usach.cl (M.J.G)

<sup>2</sup> Departamento de Ingeniería Química Industrial y del Medio Ambiente, Escuela Técnica Superior de Ingenieros Industriales, Universidad Politécnica de Madrid (ETSII-UPM), Calle José Gutiérrez Abascal 2, 28006 Madrid, Spain.; m.arrieta@upm.es (M.P.A.)

<sup>3</sup> Instituto Universitario de Tecnología de Materiales (IUTM), Universidad Politécnica de Valencia (UPV), Plaza Ferrándiz y Carbonell 1, Alcoy 03801, Spain; anagrod@epsa.upv.es (Á.A.)

<sup>4</sup> Grupo de Investigación: Polímeros, Caracterización y Aplicaciones (POLCA), 28006 Madrid, Spain.; m.arrieta@upm.es (M.P.A.)

<sup>5</sup> Laboratory of Membrane Separation Processes (LabProSeM), Department of Chemical Engineering and Bioprocesses, Engineering Faculty, University of Santiago de Chile (USACH), Santiago 9170201, Chile; julio.romero@usach.cl (J.R.)

\* Correspondence: m.arrieta@upm.es (M.A.); simon.faba@usach.cl (S.F.)

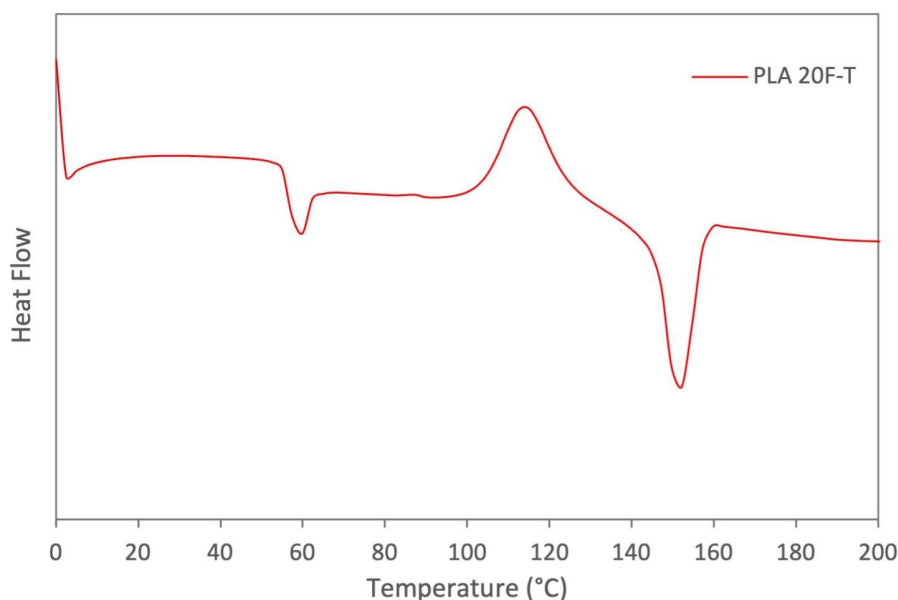

Figure S1. DSC curves of 3D printed PLA20F-T sample.
